# Supplementary material for: A neuroepithelial wave of BMP signalling drives anteroposterior specification of the tuberal hypothalamus
Source: eLife. 2023 Feb 10;12:e83133. doi: 10.7554/eLife.83133 (PMC9917434; doi:10.7554/eLife.83133)
Supplement: Figure 5—source data 1. [file elife-83133-fig5-data1.xlsx]

## Sheet: Sheet1
Six6
PBS	Area	Mean	Min	Max	X	Y	IntDen	RawIntDen			Noggin	Area	Mean	Min	Max	X	Y	IntDen	RawIntDen
1	66841.9	88.146	22	655	624.613	659.015	5.89187e+06	14162294			1	98189.4	47.02	0	236	204.718	636.565	4.61687e+06	11097580
2	48946.2	67.279	17	235	285.136	760.002	3.29305e+06	7915510			2	39708.8	32.518	10	228	293.486	768.227	1.29124e+06	3103756
3	32480.7	69.921	16	394	564.872	701.33	2.27109e+06	5459013			3	52842.7	47.525	12	295	675.31	588.68	2.51136e+06	6036549
											4	109177	39.406	13	176	303.338	716.512	4.30226e+06	10341352
											5	59119.6	72.701	12	328	519.264	692.667	4.29803e+06	10331181
											6	38115	49.113	18	212	220.051	531.852	1.87194e+06	4499577
											7	60592	24.602	11	140	532.008	836.45	1.49069e+06	3583183
											8	57997.2	62.84	17	235	274.688	755.853	3.64453e+06	8760362
Table Analyzed	Col: Unpaired t test
Column B	Noggin
vs.	vs.
Column A	PBS
Unpaired t test
P value	0.0197
P value summary	*
Significantly different (P < 0.05)?	Yes
One- or two-tailed P value?	Two-tailed
t, df	t=2.830, df=9
How big is the difference?
Mean of column A	75.12
Mean of column B	46.97
Difference between means (B - A) ± SEM	-28.15 ± 9.948
95% confidence interval	-50.65 to -5.645
R squared (eta squared)	0.4708
F test to compare variances
F, DFn, Dfd	1.865, 7, 2
P value	0.7856
P value summary	ns
Significantly different (P < 0.05)?	No
Data analyzed
Sample size, column A	3
Sample size, column B	8
