# Supplementary material for: A neuroepithelial wave of BMP signalling drives anteroposterior specification of the tuberal hypothalamus
Source: eLife. 2023 Feb 10;12:e83133. doi: 10.7554/eLife.83133 (PMC9917434; doi:10.7554/eLife.83133)
Supplement: Figure 5—source data 2. [file elife-83133-fig5-data2.xlsx]

## Sheet: Sheet1
		FOXA2	TBX2	SIX6	ISL1
Control	Strong	0	71.4286	73.3333	66.6667
	Weak	33.3333	28.5714	26.6667	0
	Negative	66.6667	0	0	33.3333
		FOXA2	TBX2	SIX6	ISL1
Noggin HH6-8	Strong	60	0	20	0
	Weak	30	30	50	30
	Negative	10	70	30	70
		FOXA2	TBX2	SIX6	ISL1
Noggin at HH10	Strong	0	0	0	0
	Weak	75	25	85.7143	33.3333
	Negative	25	75	14.2857	66.6667
		FOXA2	TBX2	SIX6	ISL1
Noggin at HH14	Strong	0	60	83.3333	40
	Weak	20	20	16.6667	40
	Negative	80	20	0	20
