# Supplementary material for: A neuroepithelial wave of BMP signalling drives anteroposterior specification of the tuberal hypothalamus
Source: eLife. 2023 Feb 10;12:e83133. doi: 10.7554/eLife.83133 (PMC9917434; doi:10.7554/eLife.83133)
Supplement: Figure 6—source data 1. [file elife-83133-fig6-data1.xlsx]

## Sheet: Sheet1
PBS Bead	Area	Mean	Min	Max	X	Y	IntDen	RawIntDen			BMP2/7 Bead	Area	Mean	Min	Max	X	Y	IntDen	RawIntDen
1	39421.3	36.523	15	189	404.303	561.714	1.43976e+06	3460764			1	2661.73	34.987	14	181	289.307	559.798	93125.1	223845
2	4153.59	23.52	12	73	236.732	738.997	97692.7	234824			2	2685.44	34.48	14	190	609.109	670.656	92593	222566
3	18624.2	35.677	13	164	362.067	684.922	664449	1597136			3	16759.6	47.24	11	249	603.839	580.431	791728	1903078
4	20451.4	40.82	13	223	573.288	671.321	834835	2006694			4	15112.1	42.872	14	213	282.977	673.942	647879	1557309
5	10502.1	30.298	13	73	626.778	712.38	318195	764845			5	4649.49	35.812	13	155	472.529	628.73	166509	400239
6	7396.09	33.205	15	124	304.859	755.352	245589	590322			6	11777.3	50.078	16	214	443.916	646.002	589779	1417652
											7	21843	50.433	17	244	522.21	659.92	1.10161e+06	2647951
Table Analyzed	Col: Unpaired t test
Column B	BMP2/7
vs.	vs.
Column A	PBS
Unpaired t test
P value	0.0342
P value summary	*
Significantly different (P < 0.05)?	Yes
One- or two-tailed P value?	Two-tailed
t, df	t=2.417, df=11
How big is the difference?
Mean of column A	33.34
Mean of column B	42.27
Difference between means (B - A) ± SEM	8.931 ± 3.696
95% confidence interval	0.7974 to 17.06
R squared (eta squared)	0.3468
F test to compare variances
F, DFn, Dfd	1.449, 6, 5
P value	0.7012
P value summary	ns
Significantly different (P < 0.05)?	No
Data analyzed
Sample size, column A	6
Sample size, column B	7
