# Supplementary material for: A neuroepithelial wave of BMP signalling drives anteroposterior specification of the tuberal hypothalamus
Source: eLife. 2023 Feb 10;12:e83133. doi: 10.7554/eLife.83133 (PMC9917434; doi:10.7554/eLife.83133)
Supplement: Figure 6—source data 2. [file elife-83133-fig6-data2.xlsx]

## Sheet: Area of SHH Expression
			Area	Mean	Min	Max	X	Y	IntDen	RawIntDen
PBS embryo 1		1	152420	110.599	0	727	304.47	628.823	1.68575e+07	40520297
PBS embryo 1a		2	128875	108.465	9	878	569.071	645.142	1.39784e+07	33599839
PBS embryo 2		3	157940	73.56	7	323	320.174	659.305	1.16181e+07	27926557
PBS embryo 2a		4	178380	82.657	0	397	572.244	574.365	1.47444e+07	35441238
PBS embryo 3		5	145840	17.824	10	584	367.147	661.287	2.59946e+06	6248327
PBS embryo 3a		6	171047	61.345	0	285	508.861	536.687	1.04929e+07	25221767
BMP2/7 embryo 1		7	68686.1	112.448	9	550	420.076	630.028	7.72359e+06	18565202
BMP2/7 embryo 1a		8	70932.7	108.717	9	580	588.972	640.585	7.7116e+06	18536385
BMP2/7 embryo 2		9	12539.4	13.073	7	42	518.649	537.1	163923	394021
BMP2/7 embryo 2a		10	20431.8	8.94	5	164	470.417	470.105	182668	439079
BMP2/7 embryo 3		12	37144.4	22.499	5	133	349.04	735.647	835699	2008772
BMP2/7 embryo 3		13	31067.9	15.076	8	60	511.222	667.102	468379	1125843
Table Analyzed	Col: Unpaired t test
Column B	BMP2/7
vs.	vs.
Column A	PBS
Unpaired t test
P value	<0.0001
P value summary	****
Significantly different (P < 0.05)?	Yes
One- or two-tailed P value?	Two-tailed
t, df	t=9.350, df=10

## Sheet: Area of Ant &Tub hyp
PBS embryo 1		1	193729	89.707	0	727	321.343	663.565	1.73787e+07	41773295
PBS embryo 1a		2	158059	87.86	7	878	584.408	684.897	1.38871e+07	33380456
PBS embryo 2		3	208374	58.552	6	323	334.952	690.916	1.22006e+07	29326579
PBS embryo 2a		4	212334	66.883	0	397	568.323	619.575	1.42015e+07	34136128
PBS embryo 3		5	183174	51.329	8	450	394.586	683.713	9.40205e+06	22599732
PBS embryo 3a		6	237370	49.093	0	285	474.195	571.162	1.16531e+07	28010634
BMP2/7 embryo 1		7	121908	74.176	6	702	458.318	635.722	9.04267e+06	21735877
BMP2/7 embryo 1a		8	142906	61.84	7	768	523.324	666.063	8.83727e+06	21242150
BMP2/7 embryo 2		9	66251.6	9.702	5	154	502.017	692.925	642753	1544986
BMP2/7 embryo 2a		10	102117	7.43	4	178	550.069	681.891	758709	1823709
BMP2/7 embryo 3		11	110306	14.714	3	133	314.033	767.979	1.62306e+06	3901357
BMP2/7 embryo 3
Table Analyzed	Col: Unpaired t test
Column B	BMP2/7
vs.	vs.
Column A	PBS
Unpaired t test
P value	0.0004
P value summary	***
Significantly different (P < 0.05)?	Yes
One- or two-tailed P value?	Two-tailed
t, df	t=5.382, df=9

## Sheet: Area of optic stalk entrance
PBS embryo 1		1	5033.9	37.994	21	143	764.017	685.25	191260	459733
PBS embryo 1a		2	7094.06	28.001	17	56	227.56	831.634	198643	477479
PBS embryo 2		5	7337.02	614.162	364	1028	279.363	474.362	4.50612e+06	10831362
PBS embryo 2a		12	8705.32	713.176	517	970	617.392	490.732	6.20843e+06	14923205
PBS embryo 3		3	6144.27	22.118	12	135	595.894	657.482	135898	326659
PBS embryo 3a		4	5749.88	21.202	10	41	263.899	662.415	121908	293030
BMP 2/7 2mip		6	41762.3	27.382	13	86
bmp 2/7 2amip		7	39430.4	24.21	12	85
bmp 2/7 1mip		3	103732	28.664	13	120
bmp 2/7 1amip		4	79015.2	30.562	14	723
Table Analyzed	Col: Unpaired t test
Column B	BMP2/7
vs.	vs.
Column A	PBS
Unpaired t test
P value	0.0013
P value summary	**
Significantly different (P < 0.05)?	Yes
One- or two-tailed P value?	Two-tailed
t, df	t=4.830, df=8
