# Supplementary material for: A neuroepithelial wave of BMP signalling drives anteroposterior specification of the tuberal hypothalamus
Source: eLife. 2023 Feb 10;12:e83133. doi: 10.7554/eLife.83133 (PMC9917434; doi:10.7554/eLife.83133)
Supplement: Figure 6—source data 3. [file elife-83133-fig6-data3.xlsx]

## Sheet: Figure 6 -Source date file 3_Fi
PBS	BMP2/7
374	148
381	101
346	45
153	244
199	162
		Table Analyzed	Col: Unpaired t test
		Column B	BMP2/7
		vs.	vs.
		Column A	PBS
		Unpaired t test
		P value	0.0319
		P value summary	*
		Significantly different (P < 0.05)?	Yes
		One- or two-tailed P value?	Two-tailed
		t, df	t=2.594, df=8
		How big is the difference?
		Mean of column A	290.6
		Mean of column B	140
		Difference between means (B - A) ± SEM	-150.6 ± 58.07
		95% confidence interval	-284.5 to -16.70
		R squared (eta squared)	0.4568
		F test to compare variances
		F, DFn, Dfd	2.078, 4, 4
		P value	0.4962
		P value summary	ns
		Significantly different (P < 0.05)?	No
		Data analyzed
		Sample size, column A	5
		Sample size, column B	5
