# Supplementary material for: A neuroepithelial wave of BMP signalling drives anteroposterior specification of the tuberal hypothalamus
Source: eLife. 2023 Feb 10;12:e83133. doi: 10.7554/eLife.83133 (PMC9917434; doi:10.7554/eLife.83133)
Supplement: Source data 1. [file elife-83133-data1.xlsx]

## Sheet: Sheet1
Name	Transcript
FOXA2	NM_204770.1
FOXG1	NM_205193.1
SIX6	NM_204994.1
DBX1	NM_001199474.1
TBX2	XM_001235320.5 140 – 2340 only
SHH	NM_204821.1
RAX	NM_001243724.1
FGF10	NM_204770.1
ISL1	NM_205414.1
ASCL1	NM_204412.1
BMP2	NM_204358.1
BMP7	XM_417496.6
EMX2	XM_025152058.1 and XM_025152057.1
NKX2.1	NM_204616.1
NR5A1	NM_205077.1
POMC	XM_015285103.2 up to 1380
PAX6	NM_205066.1
FST	XM_015277250.2
NKX2.2	XM_015283379.2
ELAVL4	NM_204830.1
HES5	NM_001012695.1
DLL1	NM_204973.2
ID1	NM_204590.3
ID2	NM_205002.1
ID4	NM_204282.1
ONECUT1	XM_015291888.4
